# Supplementary material for: Identification of a novel de novo ANK1 R1426* nonsense mutation in a Chinese family with hereditary spherocytosis by NGS
Source: PubMed Central journal article supplement (PMC5722523; doi:10.18632/oncotarget.18243), 2017-05-27
Supplement: oncotarget-08-96791-s001.pdf [file oncotarget-08-96791-s001.pdf]

## **Identification of a novel *de novo* ANK1 R1426\* nonsense mutation in a Chinese family with hereditary spherocytosis by NGS**

### **Supplementary Materials**

**Supplementary Table 1: Variants identified by NGS. See Supplementary\_Table\_1**
